# Supplementary material
Source: ML conference proceedings conference paper supplement (https://openreview.net/forum?id=yT8hGWqoBm)

Velocity(Reference solution)

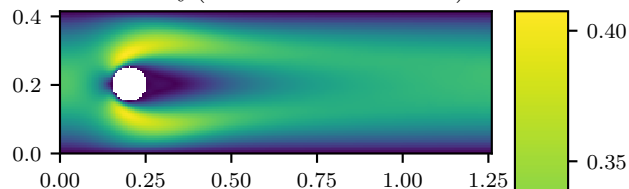

Velocity(GLSS)

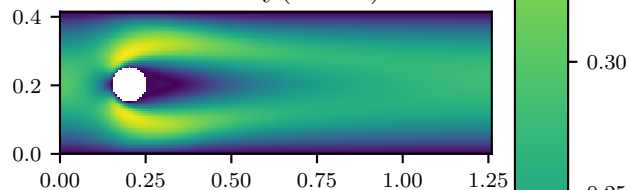

Velocity(OP)

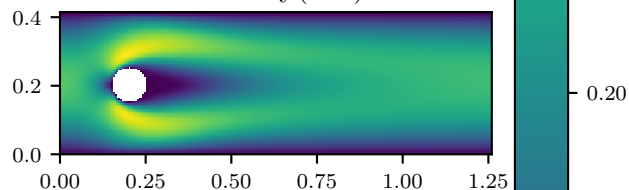

Velocity(Semi-weak)

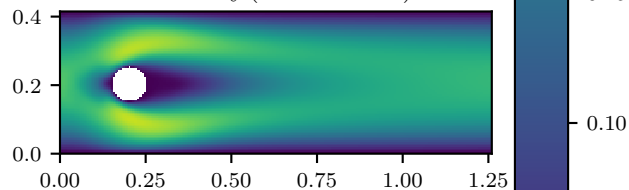

Velocity(Weak)

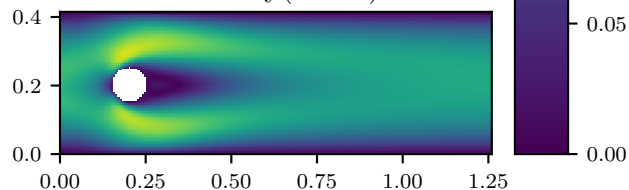

Pressure(Reference solution)

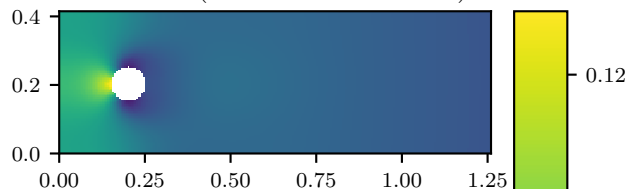

Pressure(GLSS)

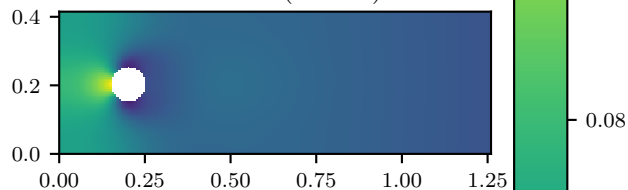

Pressure(OP)

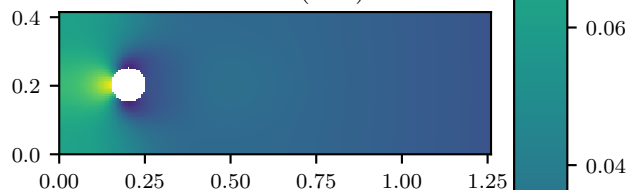

Pressure(Semi-weak)

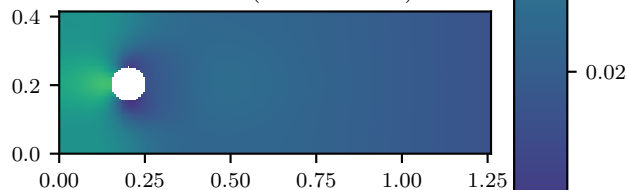

Pressure(Weak)

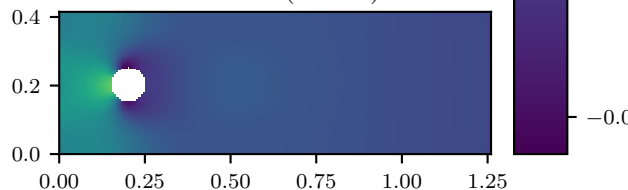

Supplement: supplementary_material [file Navier_stokes_solutions.pdf › supplementary_material/boundary-conditions-for-pinos-code/figures/Navier_stokes_solutions.pdf]
