# Supplementary material
Source: ML conference proceedings conference paper supplement (https://openreview.net/forum?id=yT8hGWqoBm)

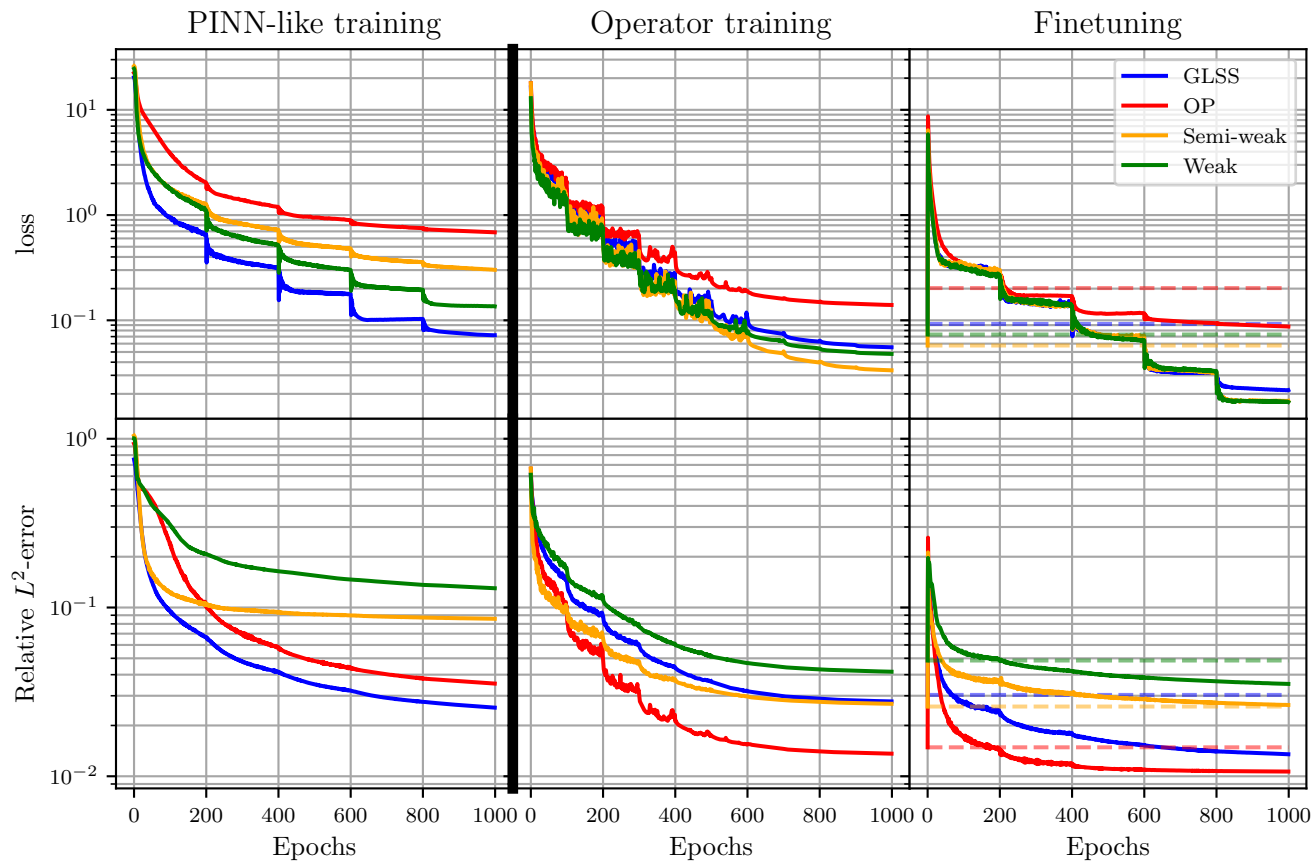

Supplement: supplementary_material [file Darcy_flow_errors_losses.pdf › supplementary_material/boundary-conditions-for-pinos-code/figures/Darcy_flow_errors_losses.pdf]

# Generalized local solution structure

Prediction

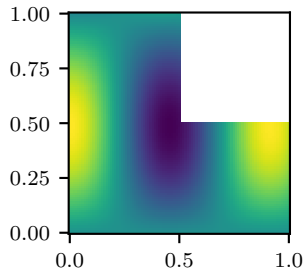

Exact Solution

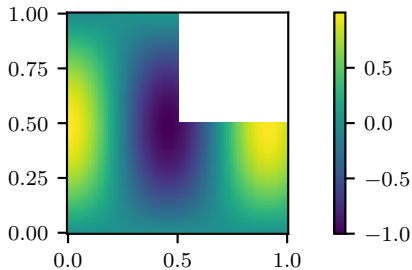

Error

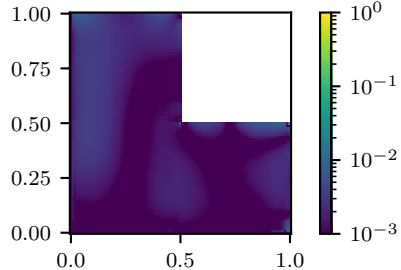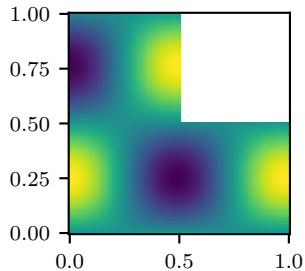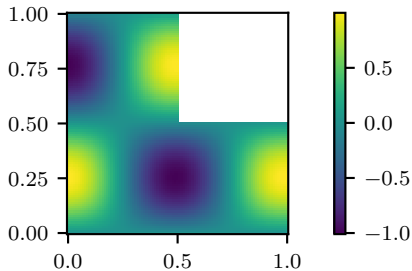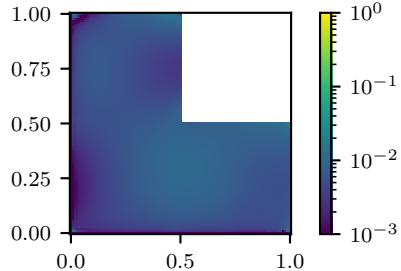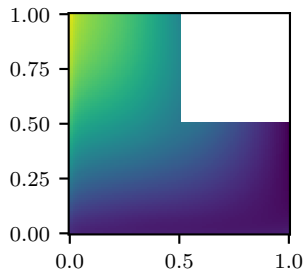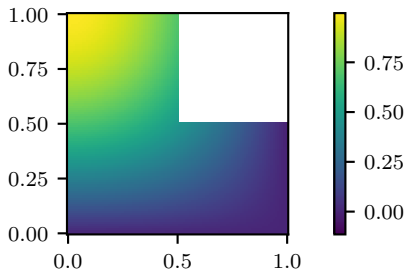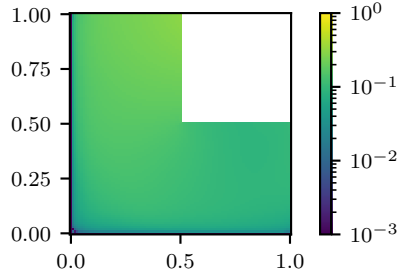

Supplement: supplementary_material [file Darcy_flow_examples_generalized_local_solution_structure.pdf › supplementary_material/boundary-conditions-for-pinos-code/figures/Darcy_flow_examples_generalized_local_solution_structure.pdf]

# Orthogonal projections

Prediction

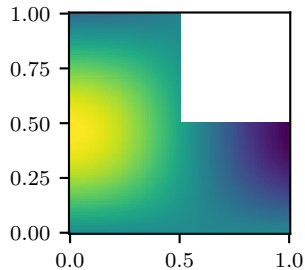

Exact Solution

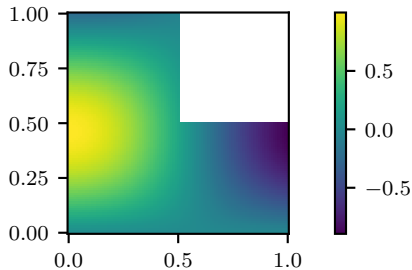

Error

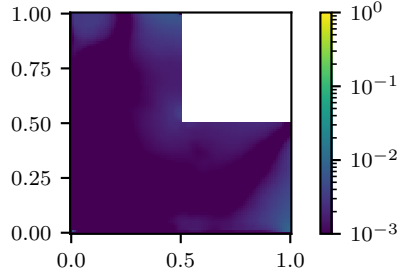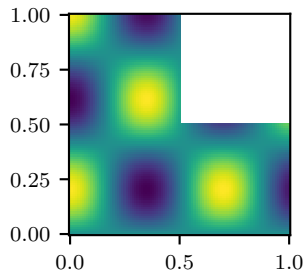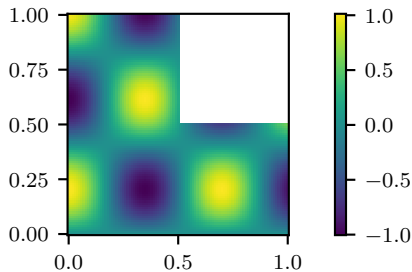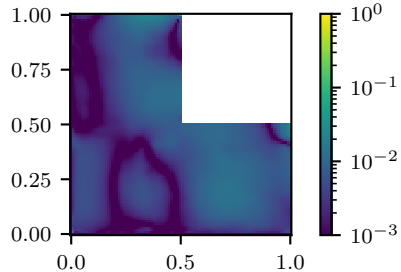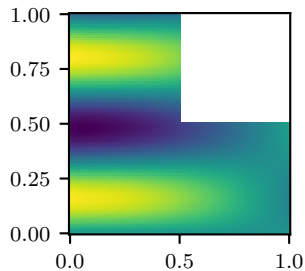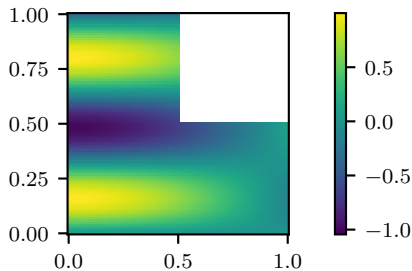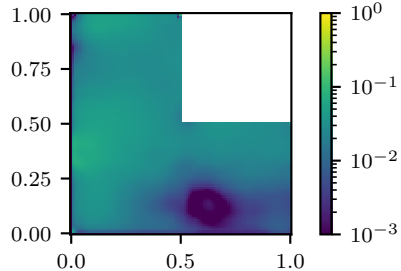

Supplement: supplementary_material [file Darcy_flow_examples_orthogonal_projections.pdf › supplementary_material/boundary-conditions-for-pinos-code/figures/Darcy_flow_examples_orthogonal_projections.pdf]

## Semi-weak

Prediction

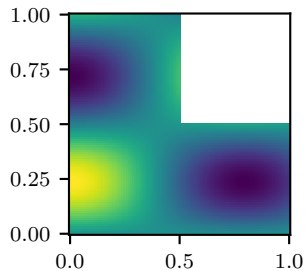

Exact Solution

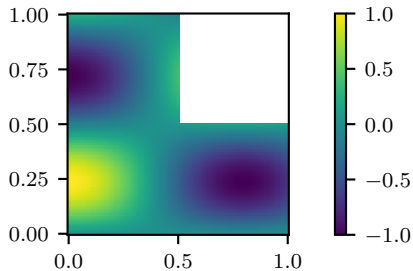

Error

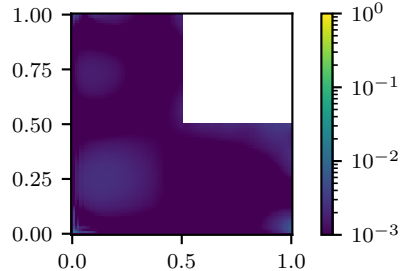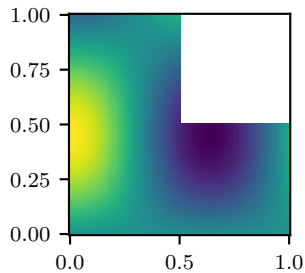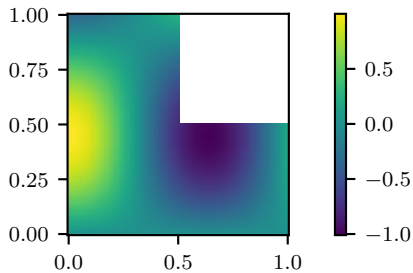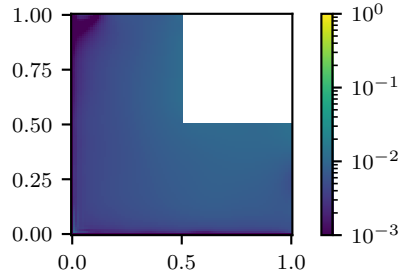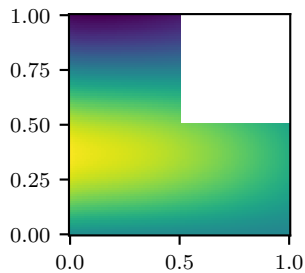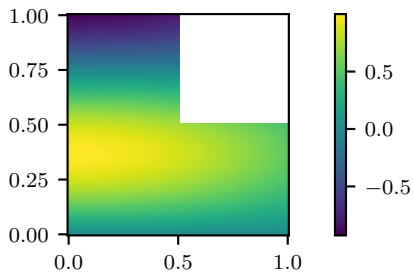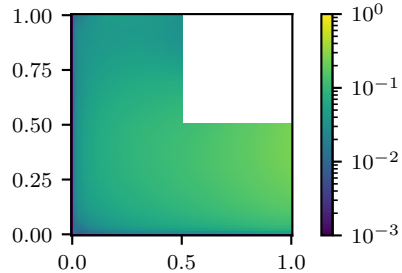

Supplement: supplementary_material [file Darcy_flow_examples_semi_weak.pdf › supplementary_material/boundary-conditions-for-pinos-code/figures/Darcy_flow_examples_semi_weak.pdf]

## Weak

Prediction

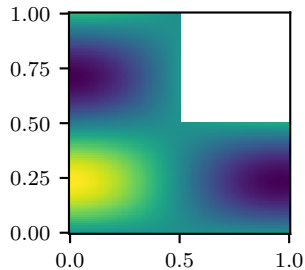

Exact Solution

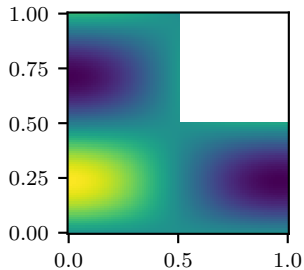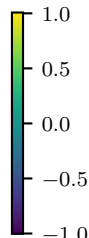

Error

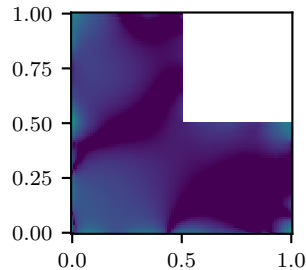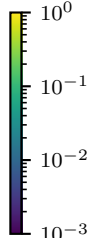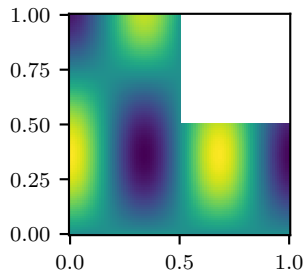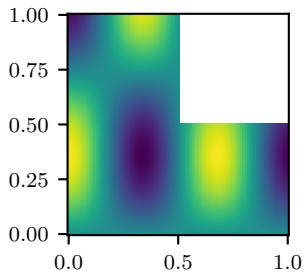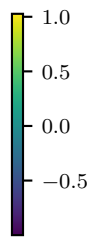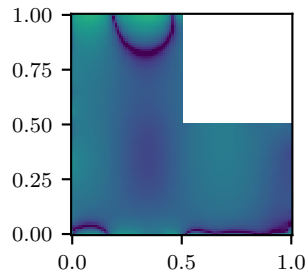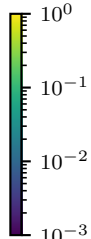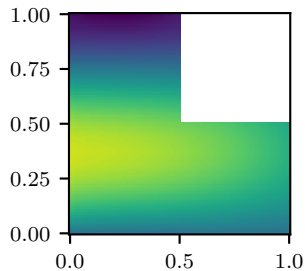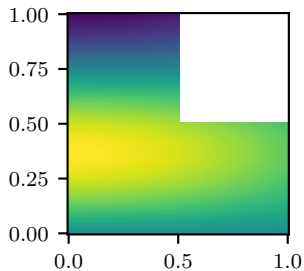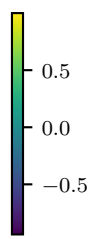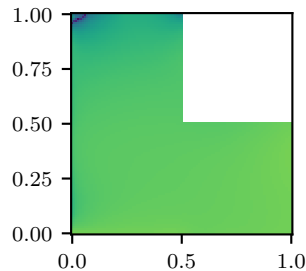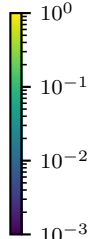

Supplement: supplementary_material [file Darcy_flow_examples_weak.pdf › supplementary_material/boundary-conditions-for-pinos-code/figures/Darcy_flow_examples_weak.pdf]

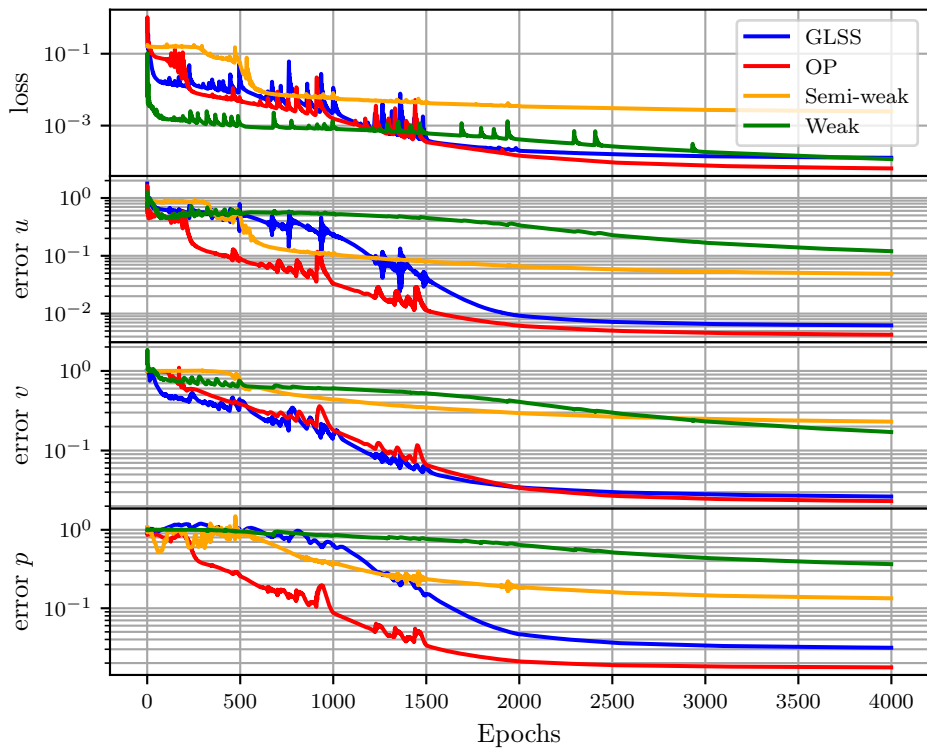

Supplement: supplementary_material [file Navier_stokes_errors_losses.pdf › supplementary_material/boundary-conditions-for-pinos-code/figures/Navier_stokes_errors_losses.pdf]

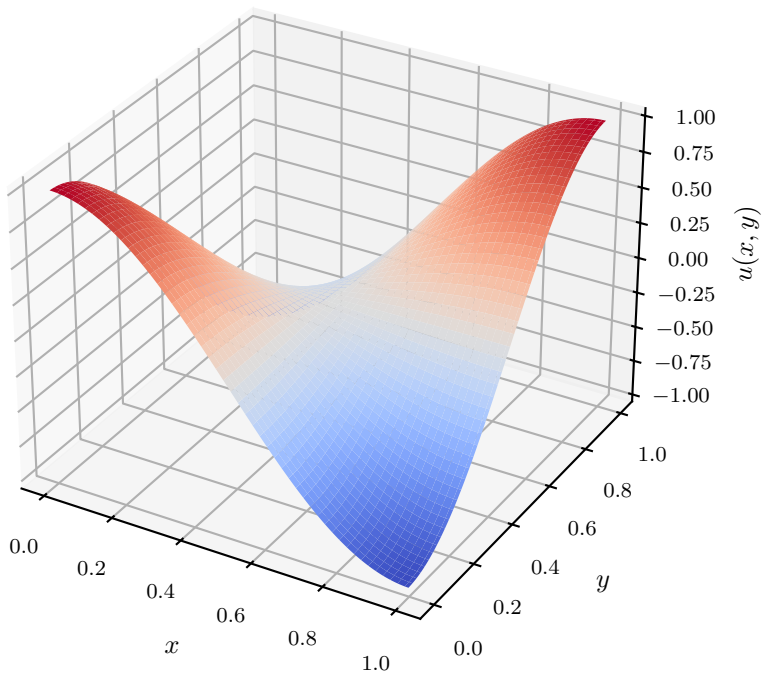

Supplement: supplementary_material [file test_neumann_analytic.pdf › supplementary_material/boundary-conditions-for-pinos-code/figures/test_neumann_analytic.pdf]

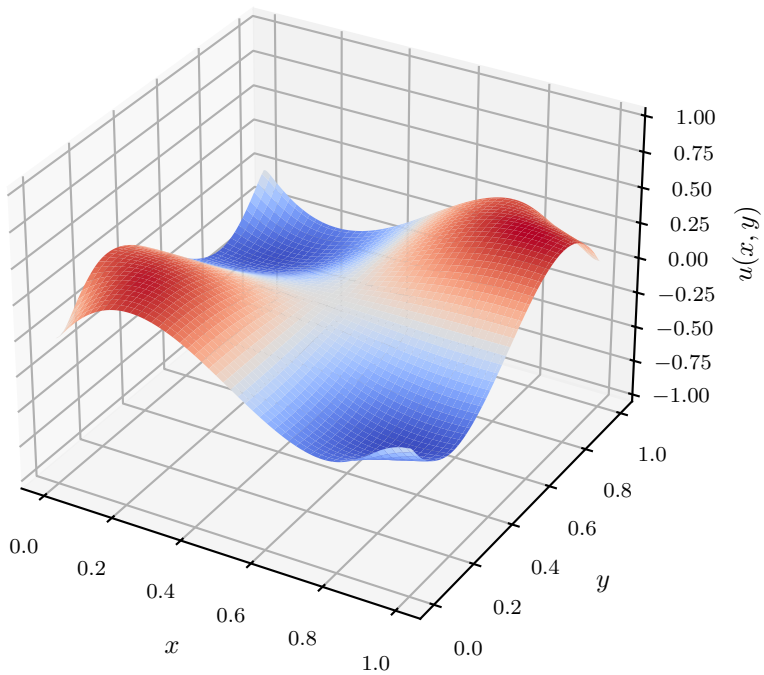

Supplement: supplementary_material [file test_neumann_multiple_distance_functions.pdf › supplementary_material/boundary-conditions-for-pinos-code/figures/test_neumann_multiple_distance_functions.pdf]

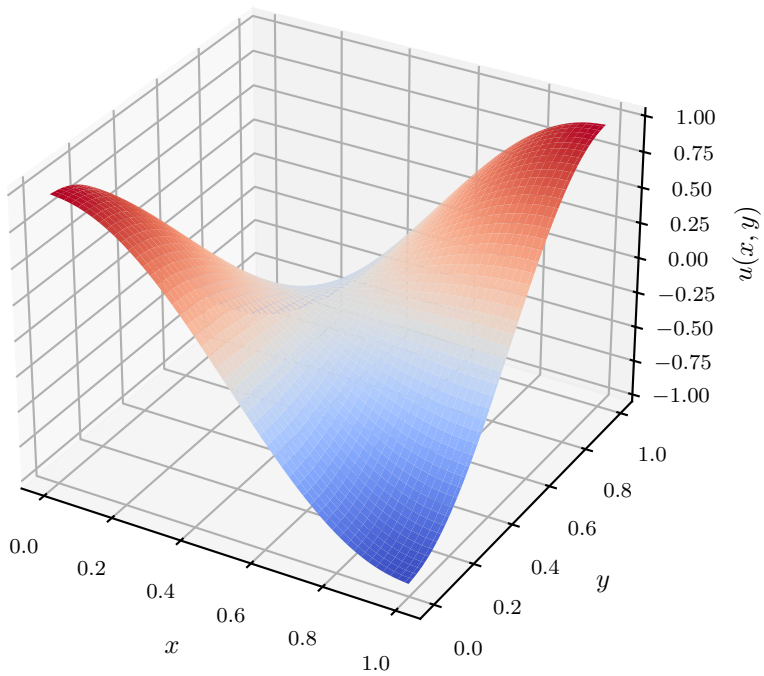

Supplement: supplementary_material [file test_neumann_our_approach.pdf › supplementary_material/boundary-conditions-for-pinos-code/figures/test_neumann_our_approach.pdf]

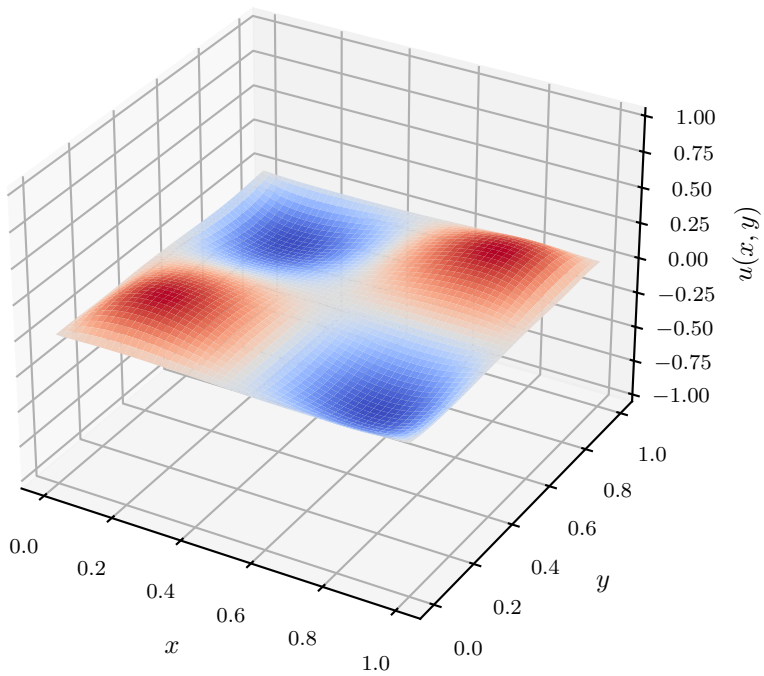

Supplement: supplementary_material [file test_neumann_single_distance_function.pdf › supplementary_material/boundary-conditions-for-pinos-code/figures/test_neumann_single_distance_function.pdf]
